# Supplementary material for: A Target Animal Effectiveness Study on Adjuvant Peptide-Based Vaccination in Dogs with Non-Metastatic Appendicular Osteosarcoma Undergoing Amputation and Chemotherapy
Source: Cancers (Basel). 2022 Mar 6;14(5):1347. doi: 10.3390/cancers14051347 (PMC8909565; doi:10.3390/cancers14051347)
Supplement: Supplementary file 1 [file cancers-14-01347-s001.zip › cancers-1605943-supplementary.pdf]

# Supplementary Materials: A Target Animal Effectiveness Study on Adjuvant Peptide-Based Vaccination in Dogs with Non-Metastatic Appendicular Osteosarcoma Undergoing Amputation and Chemotherapy

Laura Marconato, Alessia Melacarne, Marina Aralla, Silvia Sabbatini, Luca Tiraboschi, Valentina Ferrari, Offer Zeira, Andrea Balboni, Eugenio Faroni, Dina Guerra, Luciano Pisoni, Erica Ghezzi, Letizia Pettinari and Maria Rescigno

**Table S1.** Demographic information and tumor location in 54 dogs with non-metastatic appendicular osteosarcoma treated with amputation and chemotherapy, stratified according to whether they received (SOC+VAX) or did not receive (SOC) adjuvant peptide-based vaccination.

|                         | SOC+VAX<br>(n = 20)                                                                                                                                          | SOC<br>(n = 34)                                                                                                                                                   |
|-------------------------|--------------------------------------------------------------------------------------------------------------------------------------------------------------|-------------------------------------------------------------------------------------------------------------------------------------------------------------------|
| Median age (range)      | 8 (3-12) years                                                                                                                                               | 7 (1-13) years                                                                                                                                                    |
| Purebred dogs           | 16                                                                                                                                                           | 22                                                                                                                                                                |
| Most represented breeds | Boxer (n = 3); Rottweiler (n = 3);<br>Leonberger (n = 2)                                                                                                     | Rottweiler (n = 6); German shepherd (n = 4); Labrador retriever (n = 2)                                                                                           |
| Median weight (range)   | 35 (14-72) kg                                                                                                                                                | 32 (11-63) kg                                                                                                                                                     |
| Sex                     | 8 males; 12 females                                                                                                                                          | 18 males; 16 females                                                                                                                                              |
| Tumor location          | scapula (n = 1); proximal humerus (n = 5); distal radius (n = 4); distal ulna (n = 2);<br>distal femur (n = 3); proximal tibia (n = 4); distal tibia (n = 1) | scapula (n = 2); proximal humerus (n = 9); distal humerus (n = 1); distal radius (n = 8);<br>proximal femur (n = 2); distal femur (n = 7); proximal tibia (n = 5) |

**Table S2.** Distribution of variables potentially associated with prognosis in 54 dogs with non-metastatic appendicular osteosarcoma treated with amputation and chemotherapy, stratified according to whether they received (SOC+VAX) or did not receive (SOC) adjuvant peptide-based vaccination.

| Variable             | SOC+VAX<br>(n = 20) | SOC<br>(n = 34) | P     |
|----------------------|---------------------|-----------------|-------|
| Age <7 or >10 years  |                     |                 |       |
| yes                  | 9                   | 18              | 0.573 |
| no                   | 11                  | 16              |       |
| Giant breed (≥45 kg) |                     |                 |       |
| yes                  | 4                   | 3               | 0.238 |
| no                   | 16                  | 31              |       |
| Sex                  |                     |                 |       |
| male                 | 8                   | 18              | 0.358 |
| female               | 12                  | 16              |       |
| Tumor location       |                     |                 |       |
| proximal humerus     | 5                   | 9               | 0.905 |

|                                                |    |    |       |
|------------------------------------------------|----|----|-------|
| other                                          | 15 | 25 |       |
| Type of imaging                                |    |    |       |
| TBCT                                           | 14 | 20 | 0.411 |
| other                                          | 6  | 14 |       |
| Serum ALP activity                             |    |    |       |
| normal                                         | 2  | 5  | 0.619 |
| increased                                      | 18 | 29 |       |
| Monocytosis                                    |    |    |       |
| present                                        | 0  | 0  | NA    |
| absent                                         | 20 | 34 |       |
| Lymphocytosis                                  |    |    |       |
| present                                        | 0  | 0  | NA    |
| absent                                         | 20 | 34 |       |
| Histotype                                      |    |    |       |
| chondroblastic                                 | 3  | 1  | 0.102 |
| other                                          | 17 | 33 |       |
| Time between<br>amputation and<br>chemotherapy |    |    | 0.130 |
| ≤5 days                                        | 10 | 24 |       |
| >5 days                                        | 10 | 10 |       |
